# Supplementary material for: The critical relationship between vaginal microecology and Ureaplasma urealyticum: a retrospective study
Source: PeerJ. 2026 Jan 5;14:e19783. doi: 10.7717/peerj.19783 (PMC12782038; doi:10.7717/peerj.19783)
Supplement: Supplemental Information 1 [file peerj-14-19783-s001.xlsx]

## Sheet: Sheet1
Number	UU infections	Sex	Age (year)	Number of pregnancies	Number of miscarriages	Age of menarche (year)	Neutrophils count	Lymphocytes count	Platelet count	SII	Cleanliness	H2O2	Leukocyte esterase	Sialidase	N-acetyl glucosidase	β-glucuronidase
1	Positive	Women	26	1	0	12	0.58	0.32	264	478.5	III	Positive	Positive	Negative	Negative	Negative
2	Positive	Women	51	2	1	12	0.61	0.3	194	394.467	III	Positive	Positive	Positive	Negative	Negative
3	Positive	Women	25	1	0	13	0.69	0.23	222	666	II	Negative	Positive	Negative	Negative	Negative
4	Positive	Women	62	3	1	13	0.73	0.2	219	799.35	III	Positive	Positive	Positive	Negative	Negative
5	Positive	Women	30	2	1	13	0.8	0.14	324	1851.43	II	Positive	Positive	Negative	Positive	Negative
6	Positive	Women	52	2	1	14	0.82	0.11	384	2862.55	III	Positive	Positive	Negative	Negative	Negative
7	Positive	Women	44	3	2	12	0.79	0.13	384	2333.54	III	Positive	Positive	Negative	Negative	Negative
8	Positive	Women	27	1	0	14	0.91	0.08	335	3810.62	II	Positive	Negative	Negative	Negative	Negative
9	Positive	Women	31	0	0	14	0.81	0.15	213	1150.2	III	Positive	Positive	Positive	Positive	Negative
10	Positive	Women	46	3	0	13	0.74	0.21	241	849.238	II	Positive	Negative	Negative	Negative	Positive
11	Positive	Women	30	3	0	12	0.83	0.11	158	1192.18	III	Positive	Positive	Positive	Negative	Negative
12	Positive	Women	26	0	0	12	0.61	0.32	260	495.625	II	Positive	Positive	Negative	Positive	Negative
13	Positive	Women	27	1	1	13	0.8	0.15	173	922.667	III	Positive	Positive	Negative	Negative	Negative
14	Positive	Women	34	1	1	13	0.8	0.14	188	1074.29	III	Positive	Positive	Negative	Negative	Negative
15	Positive	Women	36	2	0	13	0.78	0.15	213	1107.6	III	Positive	Positive	Negative	Negative	Positive
16	Positive	Women	35	4	2	14	0.75	0.19	337	1330.26	III	Positive	Positive	Negative	Negative	Positive
17	Positive	Women	52	2	1	12	0.54	0.35	180	277.714	III	Positive	Positive	Positive	Negative	Negative
18	Positive	Women	56	1	0	17	0.62	0.31	176	352	II	Positive	Positive	Negative	Positive	Negative
19	Positive	Women	28	1	0	14	0.75	0.18	145	604.167	III	Positive	Positive	Negative	Negative	Negative
20	Positive	Women	34	2	0	13	0.65	0.29	164	367.586	III	Positive	Positive	Negative	Negative	Negative
21	Positive	Women	34	2	0	12	0.71	0.22	125	403.409	III	Positive	Positive	Negative	Negative	Negative
22	Positive	Women	45	3	3	13	0.92	0.05	263	4839.2	III	Positive	Positive	Negative	Negative	Positive
23	Positive	Women	51	1	0	16	0.74	0.22	240	807.273	IV	Positive	Positive	Positive	Positive	Positive
24	Positive	Women	23	1	0	14	0.8	0.13	180	1107.69	III	Positive	Positive	Negative	Negative	Negative
25	Positive	Women	26	1	0	14	0.7	0.22	139	442.273	III	Positive	Positive	Positive	Negative	Negative
26	Positive	Women	30	0	0	14	0.81	0.13	220	1370.77	III	Positive	Positive	Positive	Negative	Negative
27	Positive	Women	52	2	1	14	0.62	0.27	150	344.444	II	Positive	Positive	Negative	Positive	Negative
28	Positive	Women	30	0	0	12	0.8	0.13	226	1390.77	III	Positive	Positive	Negative	Negative	Negative
29	Positive	Women	45	3	2	13	0.65	0.28	298	691.786	III	Positive	Positive	Negative	Negative	Negative
30	Positive	Women	26	3	2	13	0.73	0.21	149	517.952	III	Positive	Positive	Negative	Positive	Negative
31	Positive	Women	33	0	0	15	0.7	0.16	258	1128.75	II	Positive	Negative	Negative	Negative	Negative
32	Positive	Women	29	3	2	13	0.8	0.12	271	1806.67	III	Positive	Positive	Positive	Positive	Negative
33	Positive	Women	27	0	0	14	0.92	0.03	256	7850.67	II	Positive	Negative	Negative	Negative	Negative
34	Positive	Women	37	1	0	14	0.74	0.2	261	965.7	III	Positive	Positive	Positive	Negative	Negative
35	Positive	Women	30	1	0	14	0.79	0.15	126	663.6	II	Positive	Positive	Negative	Positive	Negative
36	Positive	Women	41	3	2	12	0.9	0.07	279	3587.14	III	Positive	Positive	Negative	Negative	Negative
37	Positive	Women	34	3	1	14	0.82	0.13	159	1002.92	III	Positive	Positive	Negative	Negative	Positive
38	Positive	Women	41	2	1	13	0.7	0.24	449	1309.58	III	Positive	Positive	Negative	Negative	Negative
39	Positive	Women	28	0	0	14	0.75	0.18	223	929.167	III	Positive	Positive	Negative	Negative	Positive
40	Positive	Women	26	1	0	14	0.7	0.22	145	461.364	II	Positive	Positive	Negative	Negative	Negative
41	Positive	Women	32	2	1	13	0.77	0.14	423	2326.5	III	Positive	Positive	Positive	Negative	Negative
42	Positive	Women	28	1	0	14	0.68	0.25	212	576.64	III	Positive	Positive	Positive	Negative	Negative
43	Positive	Women	52	2	1	17	0.65	0.25	279	725.4	II	Positive	Positive	Negative	Positive	Negative
44	Positive	Women	27	1	0	13	0.72	0.2	215	774	III	Positive	Positive	Negative	Negative	Negative
45	Positive	Women	32	1	0	14	0.63	0.3	219	459.9	III	Positive	Positive	Negative	Negative	Negative
46	Positive	Women	50	2	1	14	0.47	0.41	121	138.707	III	Positive	Positive	Negative	Negative	Negative
47	Positive	Women	24	2	2	15	0.78	0.17	299	1371.88	III	Positive	Positive	Negative	Negative	Positive
48	Positive	Women	42	2	1	13	0.65	0.27	402	967.778	IV	Positive	Positive	Positive	Positive	Positive
49	Positive	Women	41	5	3	12	0.87	0.1	206	1792.2	III	Positive	Positive	Negative	Negative	Negative
50	Positive	Women	59	2	1	15	0.61	0.3	214	435.133	II	Positive	Negative	Negative	Negative	Negative
51	Positive	Women	26	2	0	13	0.88	0.09	214	2092.44	III	Positive	Positive	Positive	Positive	Negative
52	Positive	Women	29	1	0	12	0.76	0.17	237	1059.53	II	Positive	Negative	Negative	Negative	Negative
53	Positive	Women	24	1	0	12	0.87	0.06	309	4480.5	III	Positive	Positive	Positive	Negative	Negative
54	Positive	Women	33	2	1	13	0.56	0.35	327	523.2	II	Positive	Positive	Negative	Positive	Negative
55	Positive	Women	66	2	0	18	0.62	0.26	202	481.692	III	Positive	Positive	Negative	Negative	Negative
56	Positive	Women	26	0	0	15	0.72	0.22	209	684	III	Positive	Positive	Negative	Negative	Negative
57	Positive	Women	33	2	1	13	0.85	0.11	162	1251.82	III	Positive	Positive	Negative	Negative	Negative
58	Positive	Women	27	2	1	14	0.77	0.17	351	1589.82	III	Positive	Positive	Negative	Negative	Positive
59	Positive	Women	25	1	0	14	0.75	0.19	249	982.895	III	Positive	Positive	Negative	Negative	Negative
60	Positive	Women	52	2	1	17	0.86	0.07	209	2567.71	III	Positive	Positive	Positive	Negative	Negative
61	Positive	Women	19	0	0	14	0.72	0.17	203	859.765	II	Negative	Positive	Negative	Negative	Negative
62	Positive	Women	47	2	0	13	0.86	0.1	469	4033.4	II	Positive	Negative	Negative	Negative	Negative
63	Positive	Women	69	2	0	15	0.63	0.29	192	417.103	III	Positive	Positive	Positive	Positive	Negative
64	Positive	Women	34	3	2	14	0.55	0.37	272	404.324	II	Positive	Negative	Negative	Negative	Negative
65	Positive	Women	38	3	1	14	0.81	0.12	291	1964.25	III	Positive	Positive	Positive	Negative	Negative
66	Positive	Women	38	4	2	13	0.82	0.14	330	1932.86	II	Positive	Positive	Negative	Positive	Positive
67	Positive	Women	52	2	1	14	0.58	0.35	214	354.629	III	Positive	Positive	Negative	Negative	Negative
68	Positive	Women	26	3	2	14	0.76	0.19	229	916	III	Positive	Positive	Negative	Negative	Negative
69	Positive	Women	36	3	2	14	0.59	0.32	250	460.938	III	Positive	Positive	Negative	Negative	Negative
70	Positive	Women	38	2	0	12	0.48	0.41	223	261.073	III	Positive	Positive	Negative	Negative	Positive
71	Positive	Women	32	1	0	13	0.83	0.11	405	3055.91	III	Positive	Positive	Positive	Negative	Negative
72	Positive	Women	24	1	0	13	0.61	0.3	269	546.967	IV	Positive	Negative	Negative	Positive	Negative
73	Positive	Women	51	3	1	13	6.88	1.26	256	1397.84	II	Negative	Negative	Negative	Negative	Positive
74	Positive	Women	53	4	0	13	0.8	0.11	458	3330.91	IV	Positive	Negative	Positive	Negative	Negative
75	Positive	Women	28	2	2	12	4.97	2.27	241	527.652	II	Positive	Negative	Negative	Negative	Negative
76	Positive	Women	25	3	1	14	6.38	1.25	246	1255.58	II	Negative	Positive	Positive	Negative	Negative
77	Positive	Women	36	2	1	13	2.27	1.65	245	337.061	II	Positive	Negative	Negative	Negative	Negative
78	Positive	Women	39	3	1	14	4.89	1.84	384	1020.52	III	Positive	Positive	Positive	Positive	Positive
79	Positive	Women	26	1	0	14	8.6	1.95	266	1173.13	II	Positive	Negative	Negative	Negative	Negative
80	Positive	Women	29	2	1	13	9.63	2.74	486	1708.09	III	Positive	Positive	Positive	Negative	Negative
81	Positive	Women	49	3	2	14	7.78	2.06	284.00	1072.58	II	Positive	Positive	Negative	Positive	Negative
82	Positive	Women	37	2	1	17	8.50	2.12	259.00	1038.44	III	Positive	Positive	Negative	Negative	Negative
83	Positive	Women	49	2	0	13	5.48	2.14	218.00	558.243	III	Positive	Positive	Negative	Negative	Negative
84	Positive	Women	38	3	2	14	3.15	2.1	244	366	III	Positive	Positive	Negative	Negative	Negative
85	Positive	Women	30	2	1	15	6.23	1.54	199.00	805.045	III	Positive	Positive	Negative	Negative	Positive
86	Positive	Women	37	2	0	13	2.14	1.53	142	198.614	IV	Positive	Positive	Positive	Positive	Positive
87	Positive	Women	42	3	1	12	2.99	2.61	323	370.027	III	Positive	Positive	Negative	Negative	Negative
88	Positive	Women	42	3	2	12	3.09	2.85	310	336.105	III	Positive	Positive	Positive	Negative	Negative
89	Positive	Women	30	2	1	13	7.43	2.29	430.00	1395.15	II	Negative	Positive	Negative	Negative	Negative
90	Positive	Women	31	2	0	18	4.95	1.27	256	997.795	II	Positive	Positive	Negative	Negative	Positive
91	Positive	Women	30	2	1	14	5.77	1.25	217.00	1001.67	III	Positive	Positive	Positive	Negative	Negative
92	Positive	Women	36	3	2	12	4.1	0.99	142	588.081	II	Positive	Negative	Negative	Negative	Negative
93	Positive	Women	26	1	0	14	5.8	1.61	305	1098.76	III	Positive	Positive	Negative	Positive	Negative
94	Positive	Women	31	0	0	14	5.09	3.12	246	401.327	III	Positive	Positive	Negative	Negative	Negative
95	Positive	Women	48	3	0	13	9.33	1.64	221.00	1257.27	IV	Positive	Positive	Negative	Negative	Positive
96	Positive	Women	52	3	1	12	3.62	3.3	303	332.382	III	Positive	Positive	Negative	Positive	Negative
97	Positive	Women	41	3	1	12	4.73	1.51	285.00	892.748	III	Positive	Negative	Positive	Negative	Negative
98	Positive	Women	32	2	0	14	6.58	1.92	129.00	442.094	III	Positive	Negative	Negative	Negative	Negative
99	Positive	Women	40	3	2	12	7.87	2.76	193.00	550.33	III	Positive	Positive	Negative	Negative	Negative
100	Positive	Women	29	2	1	14	4.20	1.22	147.00	506.066	III	Positive	Negative	Negative	Negative	Positive
101	Positive	Women	52	4	2	13	5.99	2.17	300.00	828.111	II	Positive	Negative	Negative	Negative	Positive
102	Positive	Women	34	3	1	14	6.85	2.05	227.00	758.512	III	Positive	Positive	Positive	Negative	Positive
103	Positive	Women	34	2	0	14	5.93	2.92	209.00	424.442	III	Positive	Positive	Positive	Negative	Positive
104	Positive	Women	41	4	2	13	2.86	2.09	258.00	353.053	III	Positive	Positive	Negative	Positive	Positive
105	Positive	Women	40	3	2	13	3.57	2.13	272.00	455.887	III	Positive	Positive	Negative	Negative	Negative
106	Positive	Women	37	2	0	18	5.78	2.08	139	386.26	II	Positive	Positive	Negative	Negative	Positive
107	Positive	Women	39	2	1	14	7.89	0.64	171.00	2108.11	II	Negative	Positive	Negative	Positive	Negative
108	Positive	Women	50	3	1	12	2.82	2.01	283	397.045	II	Positive	Positive	Negative	Negative	Positive
109	Positive	Women	49	4	2	14	7.35	3.00	351.00	859.95	III	Positive	Positive	Negative	Negative	Negative
110	Positive	Women	39	3	1	14	9.87	2.67	252.00	931.551	III	Positive	Negative	Negative	Negative	Negative
111	Positive	Women	47	3	1	13	3.96	3.01	271	356.532	III	Negative	Positive	Negative	Negative	Positive
112	Positive	Women	52	4	4	12	3.11	1.87	198	329.294	II	Negative	Negative	Negative	Negative	Positive
113	Positive	Women	30	4	3	13	5.96	1.95	313	956.656	II	Negative	Negative	Negative	Negative	Negative
114	Positive	Women	32	2	0	13	8.02	1.44	136.00	757.444	III	Positive	Positive	Negative	Positive	Positive
115	Positive	Women	24	7	5	13	9.64	1.49	372	2406.77	III	Positive	Negative	Negative	Negative	Negative
116	Positive	Women	49	2	2	13	5.33	1.35	288.00	1137.07	IV	Positive	Positive	Negative	Negative	Negative
117	Positive	Women	35	4	3	13	1.27	1.75	220	159.657	IV	Positive	Positive	Negative	Positive	Negative
118	Positive	Women	34	6	4	13	7.01	1.78	386.00	1520.15	III	Positive	Positive	Negative	Negative	Positive
119	Positive	Women	35	3	1	15	7.02	1.84	314.00	1197.98	IV	Positive	Positive	Negative	Negative	Positive
120	Positive	Women	25	6	4	14	1.77	2.02	237	207.668	IV	Negative	Negative	Negative	Negative	Positive
121	Positive	Women	34	3	1	13	9.85	1.96	190.00	954.847	III	Positive	Negative	Negative	Negative	Positive
122	Positive	Women	45	2	0	13	6.96	1.10	218.00	1379.35	IV	Positive	Positive	Negative	Positive	Positive
123	Positive	Women	36	2	0	13	8.03	2.05	147.00	575.81	II	Negative	Negative	Negative	Negative	Negative
124	Positive	Women	49	2	1	14	5.86	1.86	135.00	425.323	II	Negative	Negative	Negative	Negative	Negative
125	Positive	Women	28	4	2	13	9.12	1.39	272.00	1784.63	III	Positive	Positive	Negative	Negative	Positive
126	Positive	Women	30	1	0	13	5.8	1.61	305	1098.76	II	Negative	Negative	Negative	Negative	Negative
127	Positive	Women	32	3	0	13	4.67	3.71	288	362.523	III	Positive	Positive	Negative	Negative	Positive
128	Positive	Women	31	3	0	16	4.81	1.90	233.00	589.858	II	Negative	Negative	Negative	Negative	Positive
129	Positive	Women	50	4	3	15	7.09	1.81	295.00	1155.55	II	Positive	Negative	Negative	Negative	Negative
130	Positive	Women	52	1	0	13	6.17	3.21	179.00	344.059	II	Positive	Negative	Negative	Negative	Negative
131	Positive	Women	41	4	3	13	9.43	1.52	295	1830.16	IV	Positive	Negative	Negative	Positive	Negative
132	Positive	Women	36	3	2	13	5.64	1.6	278	979.95	II	Negative	Negative	Negative	Negative	Negative
133	Positive	Women	62	1	0	13	6.03	1.88	350.00	1122.61	IV	Positive	Negative	Positive	Negative	Negative
134	Positive	Women	35	5	3	13	11.70	2.18	317.00	1701.33	IV	Negative	Positive	Negative	Positive	Negative
135	Positive	Women	54	4	2	13	8.09	1.2	168	1132.6	II	Negative	Negative	Negative	Negative	Negative
136	Positive	Women	63	1	0	13	1.82	1.97	232.00	214.335	II	Negative	Negative	Negative	Negative	Negative
137	Positive	Women	24	2	0	13	7.72	1.04	265	1967.12	II	Negative	Negative	Negative	Negative	Positive
138	Positive	Women	24	1	0	13	4.55	1.34	251	852.276	IV	Positive	Positive	Negative	Negative	Positive
139	Positive	Women	26	4	1	13	4.32	1.31	199.00	656.244	IV	Positive	Positive	Negative	Positive	Positive
140	Positive	Women	26	3	2	13	4.23	1.76	186	447.034	II	Negative	Positive	Negative	Negative	Negative
141	Positive	Women	31	1	0	14	4.13	2.37	276	480.962	II	Positive	Negative	Negative	Negative	Negative
142	Positive	Women	31	2	0	14	4.67	2.47	242	457.547	II	Positive	Negative	Negative	Negative	Positive
143	Positive	Women	29	3	0	13	7.35	1.42	254.00	1314.72	II	Positive	Negative	Negative	Negative	Positive
144	Positive	Women	45	3	1	12	5.80	1.79	269.00	871.62	II	Negative	Negative	Negative	Negative	Positive
145	Negative	Women	38	1	0	12	1.26	1.12	275	309.375	II	Positive	Negative	Negative	Negative	Negative
146	Negative	Women	25	1	0	13	8.08	3.22	234	587.18	II	Positive	Negative	Negative	Negative	Negative
147	Negative	Women	35	3	1	13	7.1	1.42	338	1690	II	Negative	Negative	Negative	Negative	Negative
148	Negative	Women	29	2	0	13	6.47	1.62	255	1018.43	II	Negative	Negative	Negative	Negative	Negative
149	Negative	Women	25	3	1	13	7.24	1.14	197	1251.12	IV	Negative	Positive	Negative	Positive	Negative
150	Negative	Women	20	1	0	13	8.12	1.47	181	999.81	II	Negative	Positive	Negative	Negative	Negative
151	Negative	Women	35	4	2	13	4.4	1.42	218	675.493	II	Positive	Negative	Negative	Negative	Negative
152	Negative	Women	30	2	0	13	7.06	1.82	257	996.934	II	Positive	Negative	Negative	Negative	Negative
153	Negative	Women	34	4	3	13	2.49	0.46	324	1753.83	II	Positive	Positive	Negative	Negative	Negative
154	Negative	Women	28	2	0	13	4.82	0.64	457	3441.78	III	Negative	Positive	Negative	Negative	Positive
155	Negative	Women	36	7	5	13	2.59	1.8	356	512.244	II	Negative	Negative	Negative	Negative	Negative
156	Negative	Women	33	2	2	13	13.59	1.55	292	2560.18	III	Negative	Positive	Negative	Negative	Positive
157	Negative	Women	40	4	3	13	9.97	0.89	193	2162.03	II	Positive	Negative	Negative	Negative	Negative
158	Negative	Women	28	6	4	13	5.98	1.65	234	848.073	II	Negative	Negative	Negative	Negative	Negative
159	Negative	Women	34	3	1	15	3.69	1.02	142	513.706	III	Negative	Positive	Negative	Negative	Negative
160	Negative	Women	35	6	4	14	2.99	1.46	241	493.555	IV	Positive	Positive	Positive	Negative	Positive
161	Negative	Women	27	3	1	13	7.16	1.49	179	860.161	II	Negative	Positive	Negative	Negative	Negative
162	Negative	Women	31	2	0	13	7.19	0.9	259	2069.12	II	Negative	Positive	Negative	Negative	Negative
163	Negative	Women	33	2	0	13	8.41	1.57	193	1033.84	IV	Negative	Negative	Negative	Positive	Negative
164	Negative	Women	45	2	1	14	4.68	1.14	221	907.263	II	Negative	Negative	Negative	Negative	Negative
165	Negative	Women	31	4	2	13	7.27	1.38	242	1274.88	II	Positive	Negative	Negative	Negative	Negative
166	Negative	Women	69	1	0	14	2.01	1.89	194	206.317	IV	Positive	Positive	Negative	Negative	Positive
167	Negative	Women	50	2	0	14	4.74	2.26	319	669.053	III	Positive	Positive	Negative	Positive	Positive
168	Negative	Women	27	1	0	13	11.23	2.21	208	1056.94	II	Negative	Negative	Negative	Negative	Negative
169	Negative	Women	30	4	2	14	5.79	1.44	296	1190.17	II	Negative	Negative	Negative	Negative	Negative
170	Negative	Women	24	2	0	13	10.46	1.78	272	1598.38	II	Negative	Negative	Negative	Negative	Negative
171	Negative	Women	31	6	4	13	5.27	1.29	189	772.116	II	Negative	Negative	Negative	Negative	Negative
172	Negative	Women	29	2	0	13	10.83	1.15	308	2900.56	III	Positive	Positive	Negative	Negative	Positive
173	Negative	Women	22	1	0	13	7.55	1.22	230	1423.36	III	Negative	Positive	Negative	Negative	Positive
174	Negative	Women	32	3	1	13	6.44	1.28	221	1111.91	III	Negative	Positive	Negative	Positive	Positive
175	Negative	Women	34	4	2	13	7.03	1.28	154	845.797	II	Negative	Negative	Negative	Negative	Negative
176	Negative	Women	24	1	0	13	15.48	1.76	234	2058.14	II	Negative	Negative	Negative	Negative	Negative
177	Negative	Women	33	2	0	13	4.74	1.55	179	547.394	IV	Negative	Positive	Negative	Negative	Negative
178	Negative	Women	30	1	0	13	8.16	1.38	168	993.391	IV	Positive	Positive	Negative	Positive	Positive
179	Negative	Women	50	1	0	13	2.18	0.48	92	417.833	II	Positive	Negative	Negative	Negative	Negative
180	Negative	Women	26	1	0	13	9	1.39	278	1800	II	Positive	Negative	Negative	Negative	Negative
181	Negative	Women	25	1	0	13	6.2	1.5	190	785.333	III	Negative	Positive	Negative	Negative	Positive
182	Negative	Women	26	1	0	13	2.29	1.97	124	144.142	II	Negative	Negative	Negative	Negative	Negative
183	Negative	Women	22	1	0	13	6.39	2.18	299	876.427	II	Positive	Negative	Negative	Negative	Negative
184	Negative	Women	40	2	1	14	4.93	2.26	268	584.619	II	Negative	Negative	Negative	Negative	Negative
185	Negative	Women	31	4	2	13	10.15	1.55	143	936.419	II	Negative	Negative	Negative	Negative	Negative
186	Negative	Women	34	2	0	13	5.75	1.91	241	725.524	II	Negative	Negative	Negative	Negative	Negative
187	Negative	Women	24	2	0	13	6.73	1.88	202	723.117	II	Negative	Negative	Negative	Negative	Negative
188	Negative	Women	43	5	4	13	5.67	2.02	269	755.064	II	Negative	Negative	Negative	Negative	Negative
189	Negative	Women	26	1	0	13	9.06	1.73	276	1445.41	IV	Negative	Positive	Negative	Positive	Positive
190	Negative	Women	29	3	0	13	7.74	2.73	314	890.242	III	Negative	Positive	Negative	Negative	Positive
191	Negative	Women	32	3	0	16	6.89	1.59	250	1083.33	II	Negative	Negative	Negative	Negative	Negative
192	Negative	Women	65	4	3	15	11.4	2.62	213	926.794	II	Positive	Positive	Negative	Positive	Positive
193	Negative	Women	27	1	0	13	7.39	1.8	309	1268.62	IV	Negative	Positive	Negative	Positive	Positive
194	Negative	Women	34	4	3	13	7.72	2.93	319	840.505	II	Negative	Negative	Negative	Negative	Negative
195	Negative	Women	26	3	2	13	3.97	2.07	215	412.343	IV	Negative	Negative	Negative	Positive	Negative
196	Negative	Women	31	5	3	13	7.8	1.34	270	1571.64	IV	Negative	Positive	Negative	Negative	Negative
197	Negative	Women	25	4	2	13	4.6	1.08	142	604.815	II	Negative	Negative	Negative	Negative	Negative
198	Negative	Women	25	2	0	13	6.18	1.34	204	940.836	IV	Negative	Positive	Negative	Negative	Negative
199	Negative	Women	46	3	2	13	4.28	1.45	211	622.814	II	Positive	Negative	Negative	Positive	Negative
200	Negative	Women	38	4	1	13	6.7	2.3	237	690.391	IV	Negative	Positive	Negative	Positive	Positive
201	Negative	Women	34	3	2	13	5.38	1.16	250	1159.48	II	Positive	Negative	Negative	Negative	Negative
202	Negative	Women	39	5	3	13	5.88	1.8	295	963.667	II	Negative	Negative	Negative	Negative	Negative
203	Negative	Women	22	1	1	13	10.75	1.96	445	2440.69	IV	Positive	Negative	Positive	Negative	Negative
204	Negative	Women	46	2	0	13	3.49	1.06	278	915.302	III	Positive	Positive	Negative	Negative	Positive
205	Negative	Women	39	4	2	13	9.71	1.24	207	1620.94	III	Negative	Positive	Negative	Negative	Positive
206	Negative	Women	31	1	0	13	5.85	1.37	204	871.095	III	Negative	Positive	Negative	Negative	Negative
207	Negative	Women	52	4	2	13	4.28	1.62	329	869.21	IV	Positive	Negative	Positive	Negative	Negative
208	Negative	Women	52	4	2	13	4.28	1.62	329	869.21	II	Positive	Negative	Negative	Negative	Negative
209	Negative	Women	33	6	3	13	5.68	1.37	190	787.737	IV	Negative	Negative	Negative	Positive	Negative
210	Negative	Women	25	1	0	13	5.79	1.89	332	1017.08	III	Negative	Positive	Negative	Negative	Negative
211	Negative	Women	59	1	0	14	4.87	2.21	240	528.869	II	Positive	Negative	Negative	Negative	Negative
212	Negative	Women	33	4	2	13	7.3	1.28	180	1026.56	III	Negative	Positive	Negative	Positive	Positive
213	Negative	Women	40	3	2	13	3.06	3.13	207	202.371	II	Negative	Negative	Negative	Negative	Negative
214	Negative	Women	35	3	1	13	6.17	1.5	234	962.52	II	Positive	Negative	Negative	Negative	Negative
215	Negative	Women	21	1	0	13	8.51	2.75	198	612.72	II	Positive	Negative	Negative	Negative	Negative
216	Negative	Women	38	4	2	13	7.6	2.15	178	629.209	II	Positive	Negative	Negative	Negative	Negative
217	Negative	Women	30	3	1	13	5.18	1.27	226	921.795	II	Negative	Negative	Negative	Negative	Negative
218	Negative	Women	25	1	0	13	7.05	1.44	286	1400.21	IV	Negative	Positive	Negative	Positive	Negative
219	Negative	Women	35	4	2	13	9.94	1.72	228	1317.63	II	Negative	Negative	Negative	Negative	Negative
220	Negative	Women	27	3	2	13	6.03	0.96	166	1042.69	II	Negative	Negative	Negative	Negative	Negative
221	Negative	Women	29	1	0	13	6.34	1.96	240	776.327	II	Negative	Positive	Negative	Negative	Negative
222	Negative	Women	31	4	1	15	7.46	1.4	169	900.529	II	Negative	Negative	Negative	Negative	Negative
223	Negative	Women	29	3	1	13	6.23	1.53	253	1030.19	IV	Negative	Negative	Positive	Negative	Negative
224	Negative	Women	49	3	2	14	2.81	1.09	231	595.514	IV	Positive	Negative	Positive	Positive	Negative
225	Negative	Women	16	1	0	13	1.9	0.87	166	362.529	II	Positive	Negative	Negative	Negative	Negative
226	Negative	Women	32	4	2	13	2.28	0.63	263	951.81	II	Negative	Negative	Negative	Negative	Negative
227	Negative	Women	53	4	2	17	3.17	1.25	306	776.016	II	Positive	Positive	Negative	Negative	Positive
228	Negative	Women	51	2	0	16	6	0.45	240	3200	III	Negative	Positive	Negative	Negative	Positive
229	Negative	Women	24	1	0	13	13.78	2.23	232	1433.61	IV	Negative	Positive	Negative	Negative	Positive
230	Negative	Women	40	5	3	14	4.3	0.34	262	3313.53	II	Negative	Negative	Negative	Negative	Negative
231	Negative	Women	44	3	2	13	4.64	2.13	302	657.878	II	Negative	Negative	Negative	Negative	Negative
232	Negative	Women	23	1	0	13	7.11	1.56	244	1112.08	IV	Negative	Positive	Negative	Negative	Positive
233	Negative	Women	28	4	2	14	3.06	3.13	207	202.371	II	Negative	Negative	Negative	Negative	Negative
234	Negative	Women	22	2	1	14	6.81	1.55	270	1186.26	II	Negative	Negative	Negative	Negative	Negative
235	Negative	Women	51	9	8	15	5.69	1.06	329	1766.05	II	Positive	Negative	Negative	Negative	Negative
236	Negative	Women	27	5	3	13	6.13	1.29	164	779.318	II	Negative	Negative	Negative	Negative	Negative
237	Negative	Women	30	1	0	13	4.43	1.37	302	976.54	IV	Negative	Positive	Negative	Negative	Negative
238	Negative	Women	15	1	0	13	4.32	1.1	215	844.364	IV	Negative	Positive	Negative	Negative	Negative
239	Negative	Women	34	1	0	13	5.35	0.91	258	1516.81	III	Negative	Positive	Negative	Negative	Negative
240	Negative	Women	31	3	1	13	9.62	2.34	229	941.444	II	Negative	Negative	Negative	Negative	Negative
241	Negative	Women	24	2	0	13	7.48	1.84	149	605.717	II	Negative	Negative	Negative	Negative	Negative
242	Negative	Women	37	5	3	14	3.29	2.3	265	379.065	II	Positive	Negative	Negative	Negative	Negative
243	Negative	Women	46	2	0	15	3.75	1.96	242	463.01	II	Negative	Negative	Negative	Negative	Negative
244	Negative	Women	40	4	2	13	9.14	1.49	210	1288.19	II	Negative	Negative	Negative	Negative	Negative
245	Negative	Women	36	4	1	13	6.03	0.96	166	1042.69	II	Negative	Negative	Negative	Negative	Negative
246	Negative	Women	21	1	0	13	11.56	2.31	285	1426.23	IV	Positive	Positive	Negative	Negative	Positive
247	Negative	Women	33	4	2	13	9.04	1.66	140	762.41	II	Negative	Negative	Negative	Negative	Negative
248	Negative	Women	23	1	0	13	6.52	1.98	319	1050.44	II	Negative	Negative	Negative	Negative	Negative
249	Negative	Women	22	3	1	13	7.24	2.08	233	811.019	IV	Negative	Positive	Negative	Positive	Positive
250	Negative	Women	34	1	0	13	6.14	1.26	183	891.762	II	Negative	Negative	Negative	Negative	Negative
251	Negative	Women	34	3	1	13	6.35	1.42	170	760.211	II	Negative	Negative	Negative	Negative	Negative
252	Negative	Women	37	2	1	13	5.31	1.5	239	846.06	II	Positive	Negative	Negative	Negative	Negative
253	Negative	Women	32	2	1	13	7.34	2.26	252	818.442	II	Negative	Negative	Negative	Negative	Negative
254	Negative	Women	31	2	0	13	7.03	1.34	253	1327.31	II	Negative	Negative	Negative	Negative	Negative
255	Negative	Women	23	1	0	13	14.86	2.08	305	2178.99	II	Negative	Negative	Negative	Negative	Negative
256	Negative	Women	28	1	0	13	5.82	2.75	266	562.953	II	Negative	Negative	Negative	Negative	Negative
257	Negative	Women	27	6	5	13	6.27	1.55	326	1318.72	IV	Positive	Positive	Positive	Negative	Positive
258	Negative	Women	37	3	0	15	3.39	1.07	217	687.505	IV	Positive	Negative	Positive	Positive	Negative
259	Negative	Women	31	5	3	13	6.13	1.21	221	1119.61	II	Negative	Negative	Negative	Negative	Negative
260	Negative	Women	33	2	1	13	6.74	1.54	194	849.065	II	Negative	Positive	Negative	Negative	Negative
261	Negative	Women	32	2	0	13	5.13	1.51	248	842.543	III	Negative	Positive	Negative	Negative	Positive
262	Negative	Women	43	3	2	15	2.55	1.83	365	508.607	II	Positive	Negative	Negative	Negative	Negative
263	Negative	Women	21	1	0	13	5.93	1.86	195	621.694	II	Negative	Positive	Negative	Negative	Negative
264	Negative	Women	36	2	0	14	5.27	1.49	236	834.711	II	Negative	Positive	Negative	Negative	Negative
265	Negative	Women	24	1	0	13	8.57	1.1	242	1885.4	IV	Negative	Positive	Negative	Positive	Positive
266	Negative	Women	23	2	0	13	8.33	2.07	349	1404.43	IV	Positive	Positive	Positive	Positive	Positive
267	Negative	Women	30	3	1	13	6.54	1.48	238	1051.7	IV	Positive	Positive	Negative	Positive	Positive
268	Negative	Women	18	1	0	13	5.9	1.21	269	1311.65	II	Negative	Negative	Negative	Negative	Negative
269	Negative	Women	38	2	1	13	8.14	1.54	253	1337.29	II	Positive	Negative	Negative	Negative	Negative
270	Negative	Women	39	7	4	13	3.96	1.68	64	150.857	II	Negative	Negative	Negative	Negative	Negative
271	Negative	Women	48	3	2	16	3.75	1.13	227	753.319	II	Negative	Negative	Negative	Negative	Negative
272	Negative	Women	32	3	1	13	8.87	1.25	234	1660.46	II	Negative	Positive	Negative	Negative	Negative
273	Negative	Women	56	2	1	14	2.44	0.93	129	338.452	IV	Negative	Negative	Negative	Positive	Negative
274	Negative	Women	48	3	2	14	2.15	1.18	245	446.398	II	Positive	Negative	Negative	Negative	Negative
275	Negative	Women	26	2	0	13	10.41	2.24	401	1863.58	II	Negative	Negative	Negative	Negative	Negative
276	Negative	Women	21	2	1	13	6.32	1.1	248	1424.87	II	Negative	Negative	Negative	Negative	Negative
277	Negative	Women	44	3	2	13	4.27	1.79	237	565.358	IV	Negative	Negative	Positive	Negative	Negative
278	Negative	Women	69	3	1	13	4.58	1.36	249	838.544	IV	Positive	Positive	Negative	Negative	Positive
279	Negative	Women	39	3	1	17	3.64	1.46	255	635.753	II	Negative	Negative	Negative	Negative	Negative
280	Negative	Women	57	3	1	12	3.15	1.19	201	532.059	II	Positive	Negative	Negative	Negative	Negative
281	Negative	Women	49	3	2	13	2.64	1.41	314	587.915	II	Positive	Negative	Negative	Negative	Negative
282	Negative	Women	28	5	3	13	8.87	2.06	382	1644.83	II	Negative	Negative	Negative	Negative	Negative
283	Negative	Women	31	8	5	13	5.64	2.06	235	643.398	II	Negative	Negative	Negative	Negative	Negative
284	Negative	Women	37	3	1	13	7.92	2.04	276	1071.53	II	Negative	Negative	Negative	Negative	Negative
285	Negative	Women	30	5	3	13	7.19	1.34	274	1470.19	II	Negative	Negative	Negative	Negative	Negative
286	Negative	Women	51	4	2	16	3.82	1.66	238	547.687	II	Positive	Negative	Negative	Negative	Negative
287	Negative	Women	50	2	1	16	2.92	1.69	419	723.953	II	Positive	Negative	Negative	Negative	Negative
288	Negative	Women	23	1	0	13	5.52	1.26	217	950.667	IV	Positive	Negative	Negative	Positive	Negative
289	Negative	Women	27	4	2	13	6.08	2.26	170	457.345	II	Negative	Negative	Negative	Negative	Negative
290	Negative	Women	43	4	2	12	4.43	1.21	302	1105.67	II	Negative	Negative	Negative	Negative	Negative
291	Negative	Women	27	3	0	13	9.79	1.11	192	1693.41	II	Positive	Negative	Negative	Negative	Negative
292	Negative	Women	53	2	0	15	7.53	3.25	487	1128.34	II	Positive	Negative	Negative	Negative	Negative
293	Negative	Women	53	2	0	14	6.07	0.15	125.00	5058.33	II	Positive	Negative	Negative	Negative	Negative
294	Negative	Women	74	2	0	14	3.58	3.62	357	353.055	II	Negative	Negative	Negative	Negative	Negative
295	Negative	Women	60	1	0	14	2.60	0.85	163.00	498.588	II	Positive	Negative	Negative	Negative	Negative
296	Negative	Women	49	1	0	14	3.32	1.87	234	415.444	II	Positive	Negative	Negative	Negative	Negative
297	Negative	Women	37	2	1	14	7.59	0.82	128	1184.78	IV	Negative	Positive	Negative	Positive	Negative
298	Negative	Women	58	4	2	17	3.94	1.67	207	488.371	II	Positive	Negative	Negative	Negative	Negative
299	Negative	Women	32	2	0	14	6.64	2.32	242	692.621	II	Positive	Negative	Negative	Negative	Negative
300	Negative	Women	40	2	1	14	3.95	1.3	289	878.115	II	Positive	Negative	Negative	Negative	Negative
301	Negative	Women	32	4	1	13	11.25	1.57	196	1404.46	IV	Positive	Positive	Positive	Negative	Negative
302	Negative	Women	32	3	1	13	9.55	1.65	261	1510.64	II	Negative	Positive	Negative	Negative	Negative
303	Negative	Women	44	1	0	13	5.89	2.59	511	1162.08	II	Negative	Positive	Negative	Negative	Negative
304	Negative	Women	35	2	1	13	6.9	1.03	187	1252.72	II	Negative	Positive	Negative	Negative	Negative
305	Negative	Women	66	5	3	16	4.33	1.86	247	575.005	II	Positive	Positive	Negative	Negative	Negative
306	Negative	Women	28	2	0	13	5.29	0.99	209	1116.78	II	Negative	Positive	Negative	Negative	Negative
307	Negative	Women	67	5	3	15	4.89	2.36	199	412.335	II	Negative	Positive	Negative	Negative	Negative
308	Negative	Women	34	4	2	13	4.11	1.75	220	516.686	II	Negative	Positive	Negative	Negative	Negative
309	Negative	Women	34	1	0	13	7.32	1.68	190	827.857	II	Negative	Positive	Negative	Negative	Negative
310	Negative	Women	67	8	6	13	4.52	2.35	220	423.149	IV	Negative	Positive	Negative	Negative	Negative
311	Negative	Women	28	1	0	14	9.43	2.35	247	991.153	II	Positive	Positive	Negative	Negative	Negative
312	Negative	Women	61	2	0	16	4.01	1.79	274	613.821	IV	Positive	Positive	Negative	Negative	Positive
313	Negative	Women	67	4	1	15	6.9	1.72	250	1002.91	II	Positive	Positive	Negative	Negative	Negative
314	Negative	Women	32	1	0	13	7.35	2.23	163	537.242	II	Positive	Positive	Negative	Negative	Negative
315	Negative	Women	30	3	1	13	7.1	1.33	160	854.135	II	Positive	Positive	Negative	Negative	Negative
316	Negative	Women	42	4	2	14	7.29	1.9	241	924.679	IV	Negative	Positive	Negative	Negative	Negative
317	Negative	Women	33	4	2	13	7.94	2.1	218	824.248	II	Negative	Positive	Negative	Negative	Negative
318	Negative	Women	35	7	5	13	9.7	1.17	268	2221.88	II	Negative	Positive	Negative	Negative	Negative
319	Negative	Women	31	3	1	13	4.42	1.64	305	822.012	II	Positive	Positive	Negative	Negative	Negative
320	Negative	Women	25	1	0	13	8.89	2.72	448	1464.24	II	Positive	Positive	Negative	Negative	Negative
321	Negative	Women	41	4	3	15	2.85	1.12	191	486.027	II	Negative	Positive	Negative	Negative	Negative
322	Negative	Women	67	1	0	13	4.19	1.81	245	567.155	II	Positive	Positive	Negative	Negative	Negative
323	Negative	Women	30	5	3	13	6.05	1.55	214	835.29	IV	Negative	Positive	Negative	Negative	Negative
324	Negative	Women	29	3	1	13	4.19	1.63	238	611.791	IV	Positive	Positive	Negative	Negative	Positive
325	Negative	Women	29	2	0	13	6.96	1.49	178	831.463	II	Positive	Positive	Negative	Negative	Negative
326	Negative	Women	24	1	0	13	6.28	1.89	325	1079.89	II	Positive	Positive	Negative	Positive	Negative
327	Negative	Women	47	3	1	15	3.31	1.09	388	1178.24	IV	Positive	Positive	Negative	Negative	Negative
328	Negative	Women	40	3	1	12	5.3	1.92	285	786.719	II	Positive	Positive	Negative	Negative	Negative
329	Negative	Women	29	2	0	14	5.2	1.44	263	949.722	II	Negative	Positive	Negative	Negative	Negative
330	Negative	Women	50	3	1	14	2.56	1.35	335	635.259	II	Positive	Positive	Positive	Negative	Negative
331	Negative	Women	37	5	4	14	2.97	1.65	231	415.8	II	Positive	Negative	Negative	Negative	Negative
332	Negative	Women	19	1	0	13	6.45	1.98	268	873.03	IV	Positive	Positive	Negative	Negative	Positive
333	Negative	Women	31	3	0	13	5.43	1.6	199	675.356	IV	Negative	Positive	Negative	Negative	Negative
334	Negative	Women	47	2	0	14	3.38	1.54	219	480.662	IV	Negative	Positive	Negative	Negative	Negative
335	Negative	Women	67	8	6	14	3.13	2.78	269	302.867	IV	Negative	Positive	Negative	Negative	Positive
336	Negative	Women	36	2	0	14	7.16	2.32	223	688.224	II	Negative	Positive	Negative	Negative	Negative
337	Negative	Women	19	1	1	14	4.49	1.67	238	639.892	IV	Negative	Positive	Positive	Negative	Negative
338	Negative	Women	28	1	0	13	6.07	1.28	213	1010.09	IV	Positive	Positive	Negative	Negative	Negative
339	Negative	Women	35	3	2	14	3.25	1.95	255	425	II	Negative	Positive	Negative	Negative	Negative
340	Negative	Women	30	2	1	13	6	1.64	225	823.171	II	Negative	Positive	Negative	Negative	Negative
341	Negative	Women	49	1	0	14	3.27	1.67	225	440.569	IV	Positive	Positive	Negative	Positive	Positive
342	Negative	Women	24	1	0	12	4.89	1.01	221	1069.99	II	Positive	Positive	Negative	Negative	Negative
343	Negative	Women	29	2	0	14	1.4	1.99	149	104.824	II	Negative	Positive	Negative	Negative	Positive
344	Negative	Women	50	4	2	15	3.05	1.63	268	501.472	IV	Positive	Positive	Negative	Negative	Positive
345	Negative	Women	50	2	0	17	4.63	0.51	468	4248.71	II	Positive	Positive	Negative	Negative	Positive
346	Negative	Women	33	2	0	13	4.91	1.97	229	570.756	IV	Positive	Positive	Negative	Negative	Positive
347	Negative	Women	43	2	1	13	5.04	1.08	271	1264.67	II	Positive	Positive	Negative	Negative	Negative
348	Negative	Women	31	1	0	14	3	1.96	251	384.184	II	Negative	Positive	Negative	Negative	Negative
349	Negative	Women	49	2	1	15	4.39	2.68	335	548.75	II	Positive	Positive	Negative	Negative	Negative
350	Negative	Women	30	2	1	13	6.59	1.33	221	1095.03	III	Negative	Positive	Negative	Negative	Negative
351	Negative	Women	59	3	0	16	9.43	2.16	425	1855.44	II	Positive	Positive	Negative	Negative	Positive
352	Negative	Women	73	2	0	15	2.79	1.93	313	452.472	II	Positive	Negative	Negative	Negative	Negative
353	Negative	Women	24	3	0	13	2.48	2.61	267	253.701	II	Negative	Positive	Negative	Negative	Negative
354	Negative	Women	20	1	0	15	6.9	1.98	199	693.485	II	Positive	Positive	Negative	Negative	Negative
355	Negative	Women	32	3	3	13	6.25	2.21	270	763.575	II	Negative	Positive	Negative	Negative	Negative
356	Negative	Women	27	1	0	13	8.87	1.38	209	1343.36	III	Negative	Positive	Negative	Negative	Positive
357	Negative	Women	48	3	2	14	4.36	2.47	222	391.87	II	Negative	Positive	Negative	Negative	Negative
358	Negative	Women	36	3	2	13	7.65	1.24	194	1196.85	II	Positive	Negative	Negative	Negative	Negative
359	Negative	Women	37	2	1	14	10.84	1.68	284	1832.48	II	Negative	Positive	Negative	Negative	Negative
360	Negative	Women	32	1	0	13	7.76	1.98	234	917.091	II	Positive	Positive	Negative	Negative	Negative
361	Negative	Women	34	4	3	12	5.65	2.77	289	589.477	IV	Negative	Positive	Negative	Negative	Negative
362	Negative	Women	33	4	2	12	4.07	1.7	195	466.853	II	Negative	Positive	Negative	Negative	Negative
363	Negative	Women	27	1	1	14	4.14	1.43	246	712.196	II	Negative	Positive	Negative	Negative	Negative
364	Negative	Women	24	2	1	15	14.25	3.4	214	896.912	II	Positive	Positive	Negative	Negative	Negative
365	Negative	Women	36	3	1	12	3.42	1.71	237	474	II	Negative	Negative	Negative	Negative	Negative
366	Negative	Women	21	2	1	13	3.46	1.25	207	572.976	II	Negative	Positive	Negative	Negative	Negative
367	Negative	Women	33	2	1	13	6.57	1.46	194	873	II	Positive	Positive	Negative	Negative	Negative
368	Negative	Women	37	4	0	13	10.41	0.55	188.00	3558.33	II	Negative	Positive	Negative	Negative	Negative
369	Negative	Women	45	4	3	13	5.31	2.42	308	675.818	II	Positive	Negative	Negative	Negative	Negative
370	Negative	Women	26	1	0	13	7.17	1.36	179	943.699	IV	Negative	Positive	Negative	Negative	Positive
371	Negative	Women	24	1	1	12	6.43	1.81	222	788.652	II	Negative	Positive	Negative	Negative	Negative
372	Negative	Women	51	3	1	11	4.79	1.8	249	662.617	III	Negative	Positive	Negative	Negative	Positive
373	Negative	Women	35	3	1	13	8.52	2.43	297	1041.33	II	Negative	Positive	Negative	Negative	Negative
374	Negative	Women	42	3	2	12	2.87	1.48	303	587.574	II	Negative	Positive	Negative	Negative	Negative
375	Negative	Women	20	1	0	13	6.07	2.06	92	271.087	IV	Positive	Positive	Negative	Negative	Positive
376	Negative	Women	26	2	1	14	5	1.68	233	693.452	II	Positive	Positive	Negative	Negative	Negative
377	Negative	Women	54	4	3	14	4.66	1.73	261	703.04	II	Positive	Positive	Negative	Negative	Negative
378	Negative	Women	38	5	3	15	4.71	1.28	199	732.258	II	Positive	Positive	Negative	Negative	Negative
379	Negative	Women	29	1	1	13	6.93	1.67	220	912.934	IV	Positive	Positive	Negative	Negative	Negative
380	Negative	Women	41	2	0	13	3.53	1.28	499	1376.15	II	Negative	Positive	Negative	Negative	Negative
381	Negative	Women	37	5	3	15	5.52	2.86	499	963.105	II	Negative	Positive	Negative	Negative	Negative
382	Negative	Women	26	1	0	12	4.79	1.23	357	1390.27	II	Positive	Positive	Negative	Negative	Negative
383	Negative	Women	49	5	3	15	8.97	0.97	471	4355.54	II	Positive	Negative	Negative	Negative	Negative
384	Negative	Women	24	1	0	13	4.47	3.41	253	331.645	II	Negative	Positive	Negative	Negative	Negative
385	Negative	Women	42	2	0	15	3.78	1.33	317	900.947	II	Negative	Positive	Negative	Negative	Negative
386	Negative	Women	29	2	2	13	5.14	1.88	238	650.702	II	Negative	Negative	Negative	Negative	Negative
387	Negative	Women	50	4	2	16	2.76	3.53	289	225.96	IV	Positive	Positive	Negative	Negative	Positive
388	Negative	Women	37	4	1	13	8.16	1.22	416	2782.43	IV	Negative	Positive	Negative	Negative	Negative
389	Negative	Women	23	5	3	17	4.48	1.61	212	589.913	II	Negative	Positive	Negative	Negative	Negative
390	Negative	Women	24	1	0	13	8.7	1.77	201	987.966	II	Negative	Positive	Negative	Negative	Negative
391	Negative	Women	38	4	2	13	8.61	1.72	172	861	II	Negative	Positive	Negative	Negative	Negative
392	Negative	Women	52	3	1	14	2.51	2.02	289	359.104	IV	Positive	Positive	Negative	Negative	Positive
393	Negative	Women	51	7	5	15	3	1.86	267	430.645	II	Negative	Positive	Negative	Negative	Negative
394	Negative	Women	16	1	0	12	3.6	2.01	186	333.134	III	Negative	Positive	Negative	Negative	Negative
395	Negative	Women	70	4	2	15	3.91	1.76	214	475.42	II	Positive	Positive	Negative	Negative	Negative
396	Negative	Women	43	2	0	14	2.03	1.32	290	445.985	IV	Positive	Positive	Negative	Negative	Negative
397	Negative	Women	53	2	0	15	2.1	1.39	218	329.353	IV	Positive	Positive	Negative	Negative	Negative
398	Negative	Women	35	1	0	13	1.54	1.17	267	351.436	III	Negative	Positive	Negative	Negative	Negative
399	Negative	Women	30	3	1	13	3.67	2.13	127	218.822	II	Negative	Positive	Negative	Negative	Negative
400	Negative	Women	41	2	1	14	5.17	1.94	365	972.706	II	Negative	Positive	Negative	Negative	Negative
401	Negative	Women	34	2	1	14	5.44	2.39	240	546.276	IV	Negative	Positive	Negative	Negative	Negative
402	Negative	Women	29	2	0	15	8.55	1.26	213	1445.36	II	Negative	Positive	Negative	Negative	Negative
403	Negative	Women	69	4	2	17	3.01	1.78	260	439.663	II	Positive	Positive	Negative	Negative	Negative
404	Negative	Women	51	4	2	15	3.77	1.38	277	756.732	II	Positive	Positive	Negative	Negative	Negative
405	Negative	Women	48	3	1	13	4.18	2.07	278	561.372	II	Positive	Positive	Negative	Negative	Negative
406	Negative	Women	30	2	1	12	3.4	1.88	238	430.426	II	Negative	Negative	Negative	Negative	Negative
407	Negative	Women	26	4	2	13	4.29	1.82	113	266.357	II	Positive	Positive	Negative	Negative	Negative
408	Negative	Women	33	4	2	16	6.53	0.87	206	1546.18	II	Negative	Positive	Negative	Negative	Negative
